# Supplementary material
Source: publisher figshare collection journal article supplement (https://frontiersin.figshare.com/ndownloader/files/18539111)
Supplement: Supplementary file [file 18539111]

### Supplementary Material

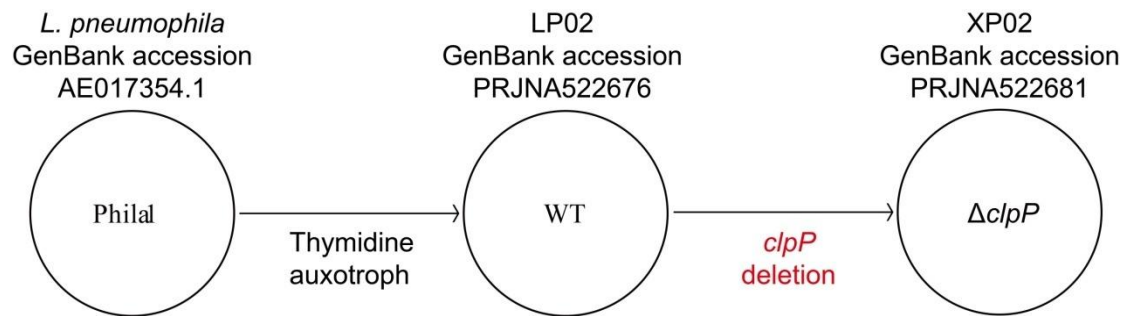

**Supplementary Figure S1. Re-sequencing of the laboratory strains of *L. pneumophila* Philadelphia-1 reveals that only *clpP* gene was deleted in  $\Delta clpP$  compared to WT.**

The results of whole genome re-sequencing showed that the *clpP* is the only deleted gene in  $\Delta clpP$  strain compared to WT strain, which not only supports the reliability of our previous reports (Li *et al.*, 2010, Zhao *et al.*, 2016), but also suggests that it is not necessary to include a *clpP* complement strain  $\Delta clpP/C$  in the indicated experiments.
